# Supplementary material for: Synthesis of polyhydroxyurethanes from di(trimethylolpropane) and their application to quaternary ammonium chloride-functionalized films
Source: Royal Society of Chemistry journal article supplement (doi:10.1039/c5ra09885h), 2015-01-01
Supplement: c5ra09885h1.pdf [file c5ra09885h1.pdf]

**Supporting Information for**

**Synthesis of Poly(hydroxyurethane)s from Di(trimethylolpropane)  
and Their Application to  
Quaternary Ammonium Chloride-functionalized Films**

Hiroyuki Matsukizono, Takeshi Endo  
Molecular Engineering Institute, Kinki University,  
11-6 Kayanomori, Iizuka, Fukuoka, 820-8555, Japan  
Correspondence to: T. Endo (E-mail: [tendo@moleng.fuk.kindai.ac.jp](mailto:tendo@moleng.fuk.kindai.ac.jp))

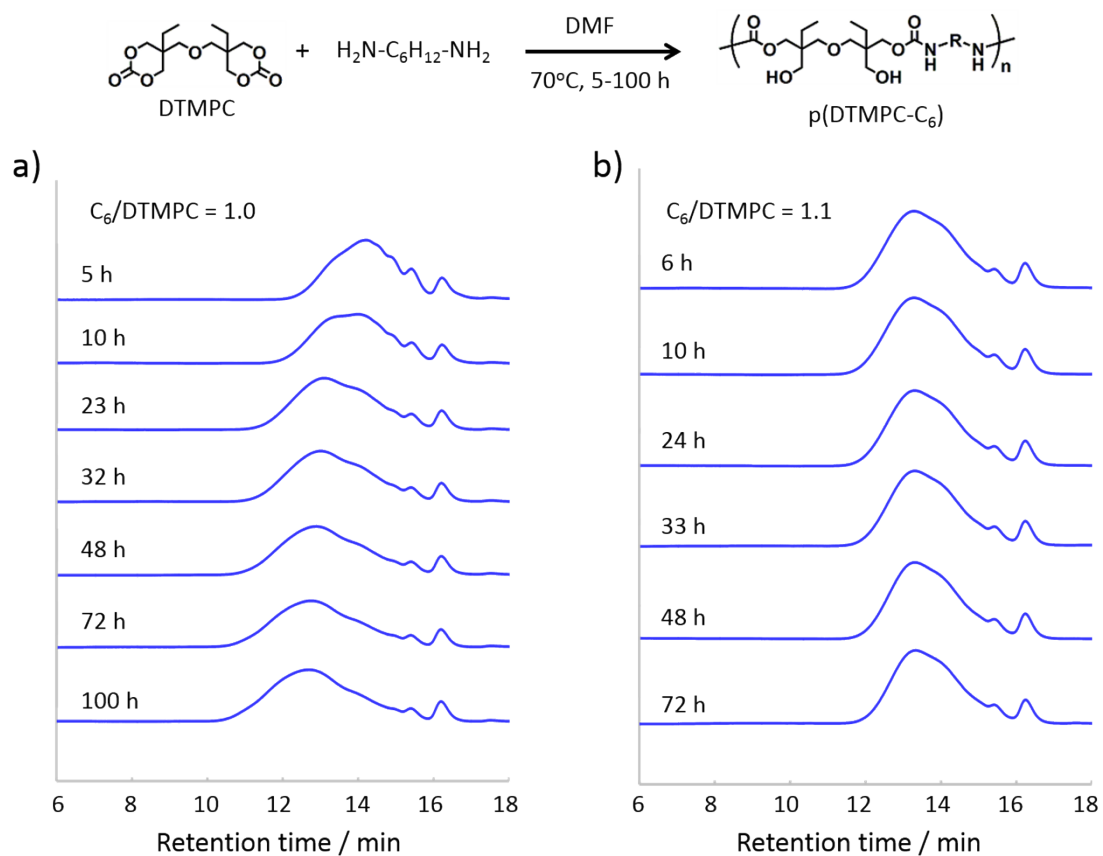

**Figure S1** SEC traces of p(DTMPC- $C_6$ ) prepared by the polyaddition of di(trimethylolpropane) (DTMPC) and 1,6-diaminohexane ( $C_6$ ) in DMF at 70 °C with different  $C_6/DTMPC$  ratios. The  $C_6/DTMPC$  feed ratios are a) 1.0 or b) 1.1. The reaction time is depicted in the figure.

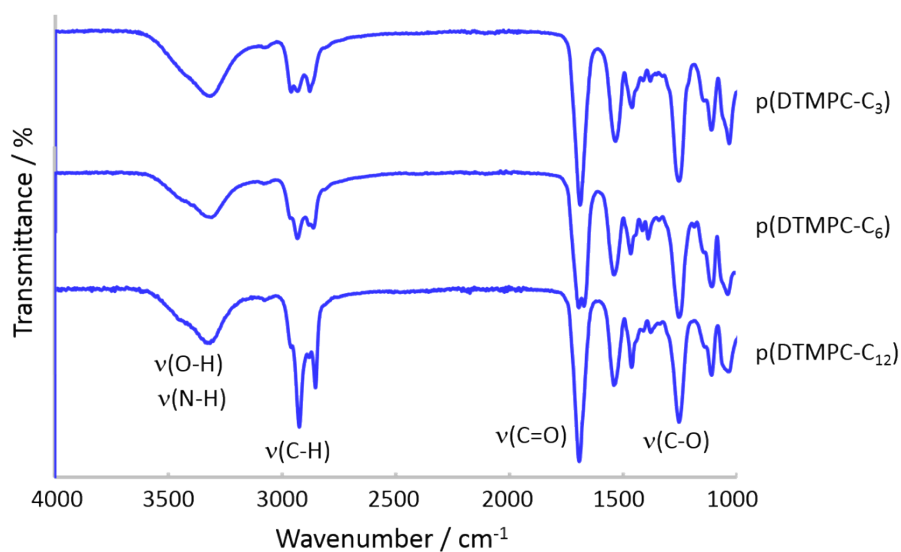

**Figure S2** FT-IR spectra of PHUs (p(DTMPC-C<sub>n</sub>)) synthesized from DTMPC and diamines with different methylene spaces.

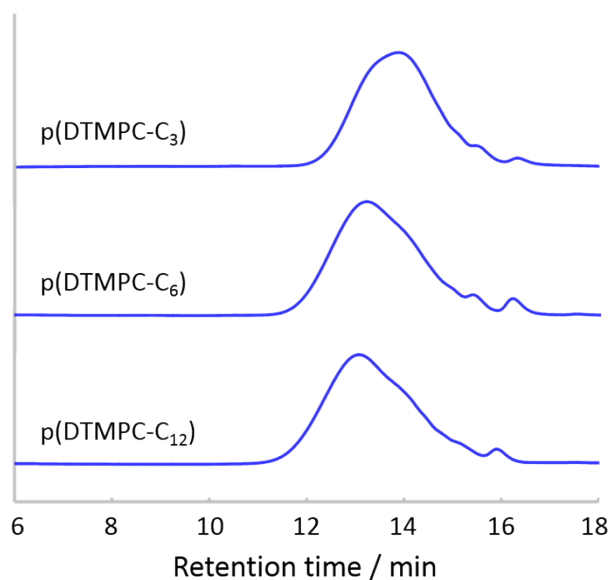

**Figure S3** SEC traces of PHUs (p(DTMPC-C<sub>n</sub>)) synthesized from DTMPC and diamines with different methylene spaces in DMF at 70 °C for 23 h.

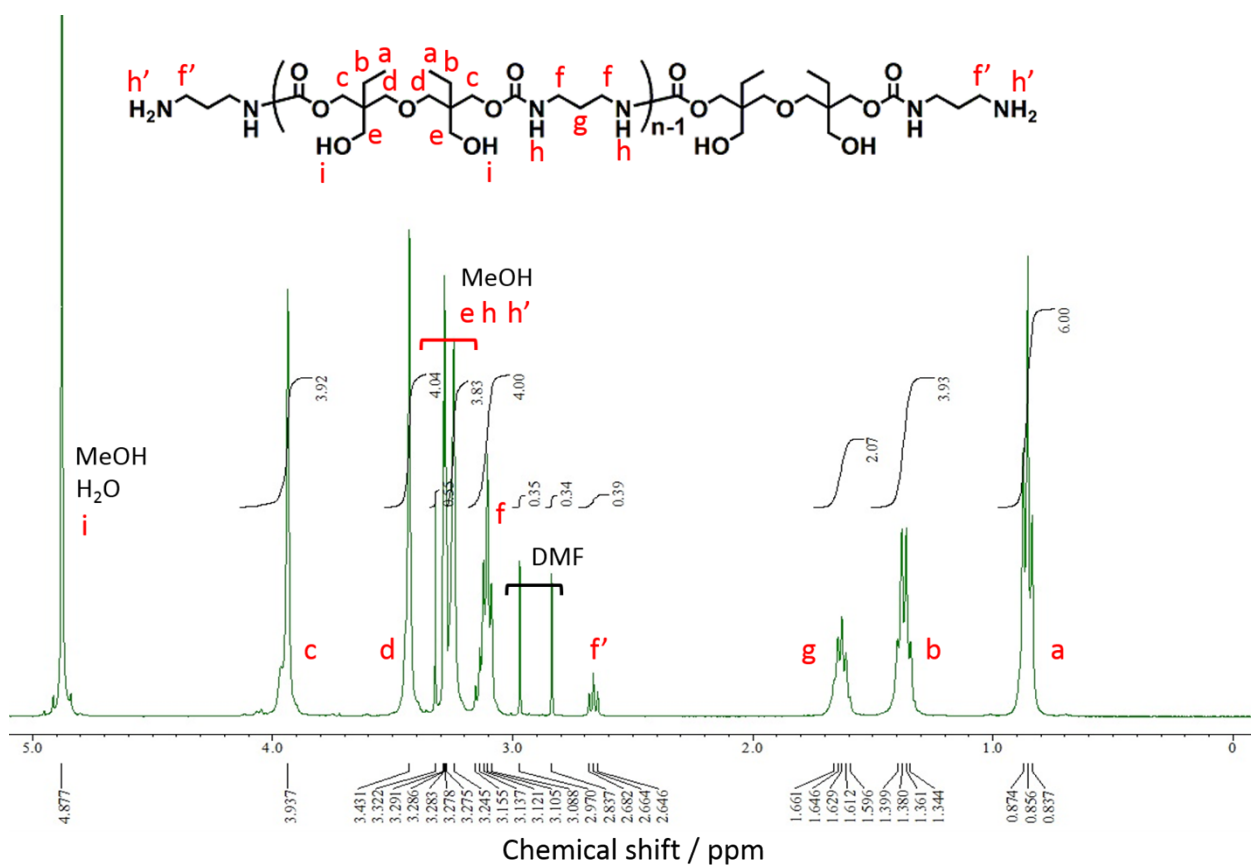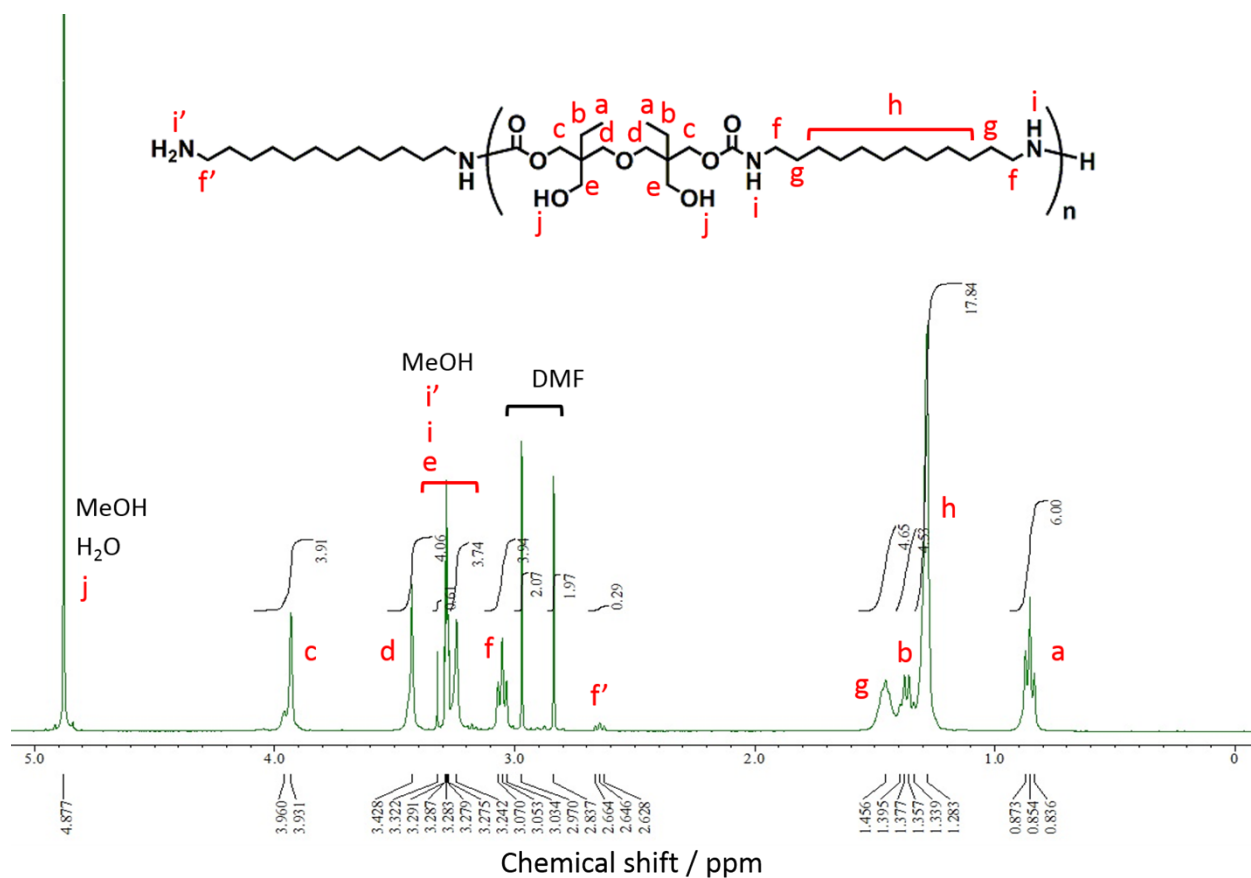

**Figure S4** <sup>1</sup>H NMR spectra of p(DTMPC-C<sub>n</sub>) in CD<sub>3</sub>OD. Top: p(DTMPC-C<sub>3</sub>). Bottom: p(DTMPC-C<sub>12</sub>). The PHUs were synthesized from DTMPC and corresponding diamines with different methylene spaces in DMF at 70 °C for 23 h. The attribution of each signal is depicted in the figures.

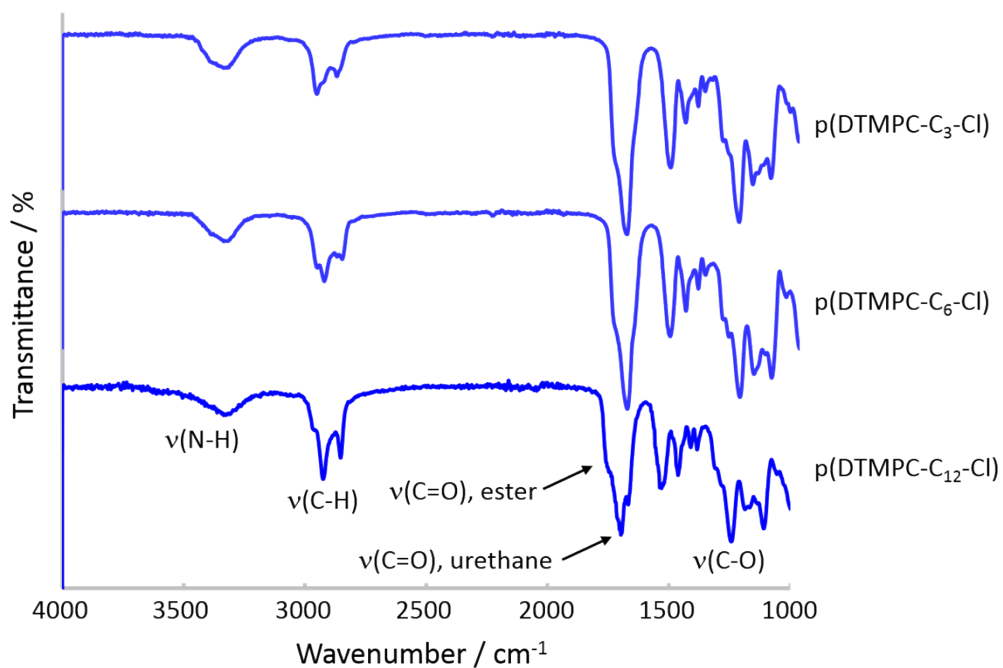

**Figure S5** FT-IR spectra of chloroacetylated PHUs (p(DTMPC-C<sub>n</sub>-Cl)) PHUs were synthesized from DTMPC and diamines with different methylene spaces and subsequently acetylated.

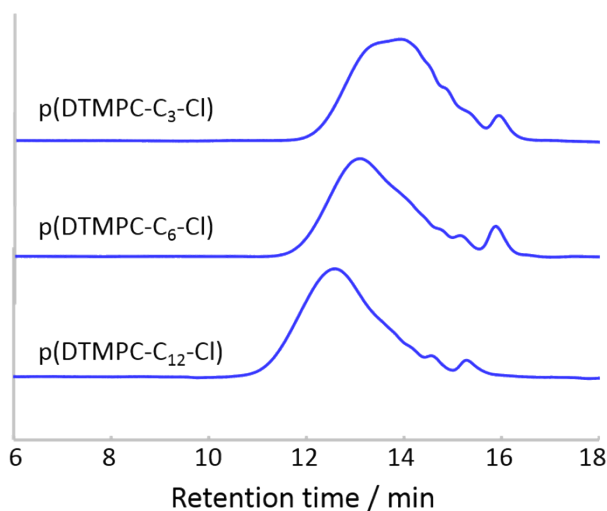

**Figure S6** FT-IR spectra of chloroacetylated PHUs (p(DTMPC-C<sub>n</sub>-Cl)) PHUs were synthesized from DTMPC and diamines with different methylene spaces and subsequently acetylated.

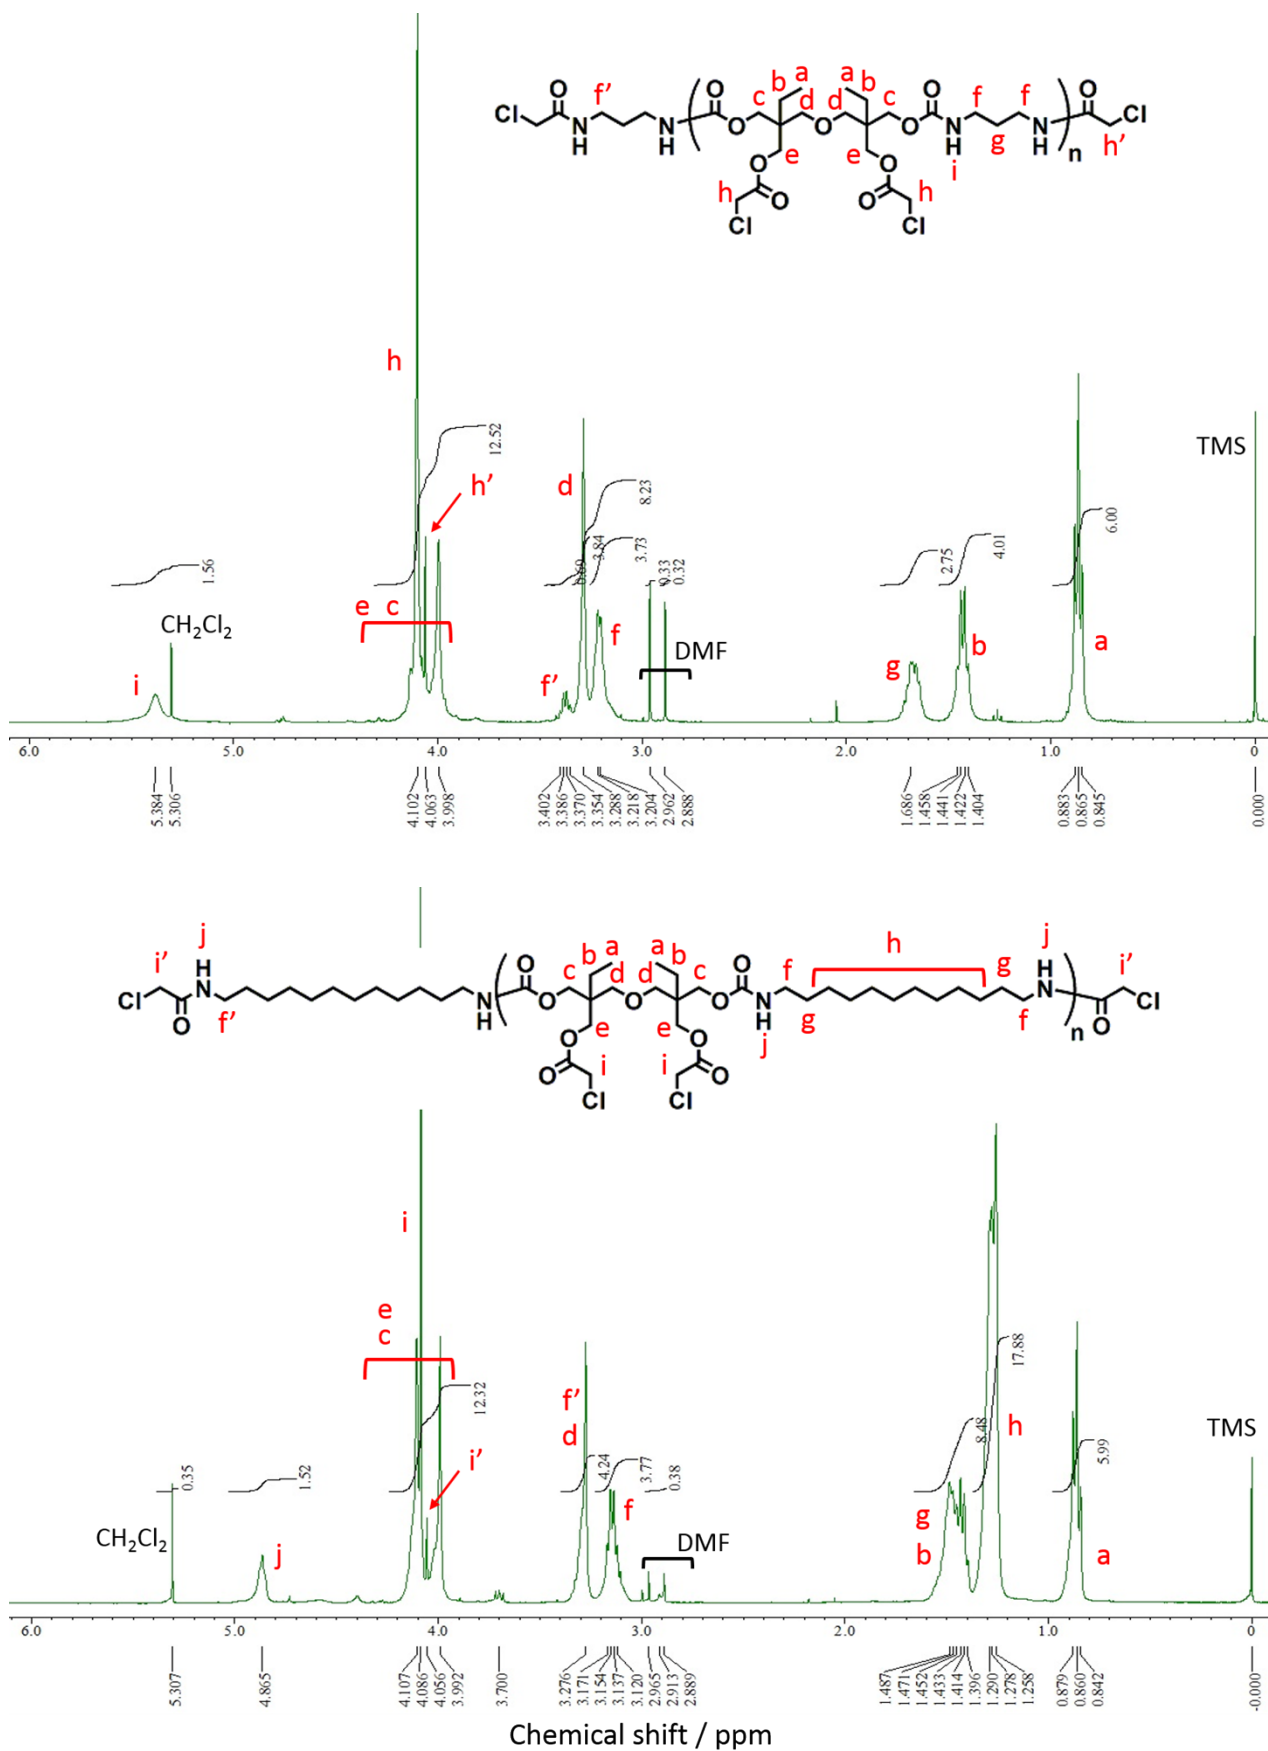

**Figure S7**  $^1\text{H}$  NMR spectra of acetylated PHUs ( $p(\text{DTMPC-}\text{C}_n\text{-Cl})$ ) in  $\text{CDCl}_3$ . Top:  $p(\text{DTMPC-}\text{C}_3\text{-Cl})$ . Bottom:  $p(\text{DTMPC-}\text{C}_{12}\text{-Cl})$ . The PHUs were synthesized from DTMPC and corresponding diamines with different methylene spaces and acetylated. The attribution of each signal is depicted in the figures.

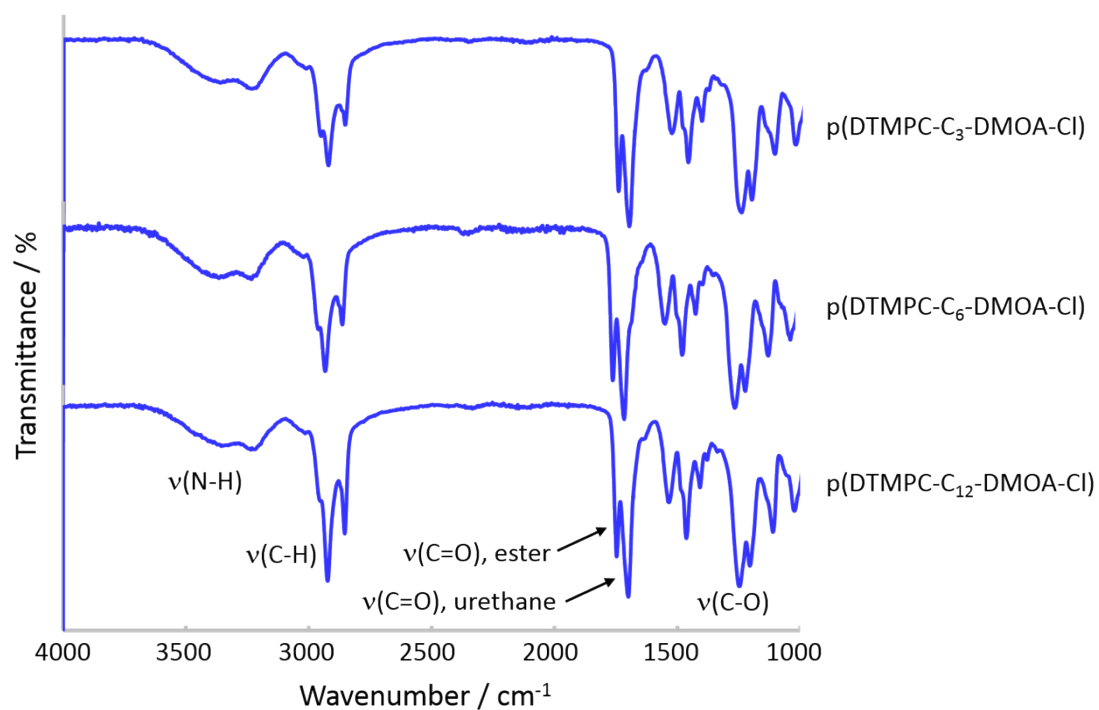

**Figure S8** FT-IR spectra of QAC-functionalized PHUs (p(DTMPC-C<sub>n</sub>-DMOA-Cl)). PHUs were synthesized from DTMPC and diamines with different methylene spaces and subsequently acetylated followed by quaternized with DMOA.

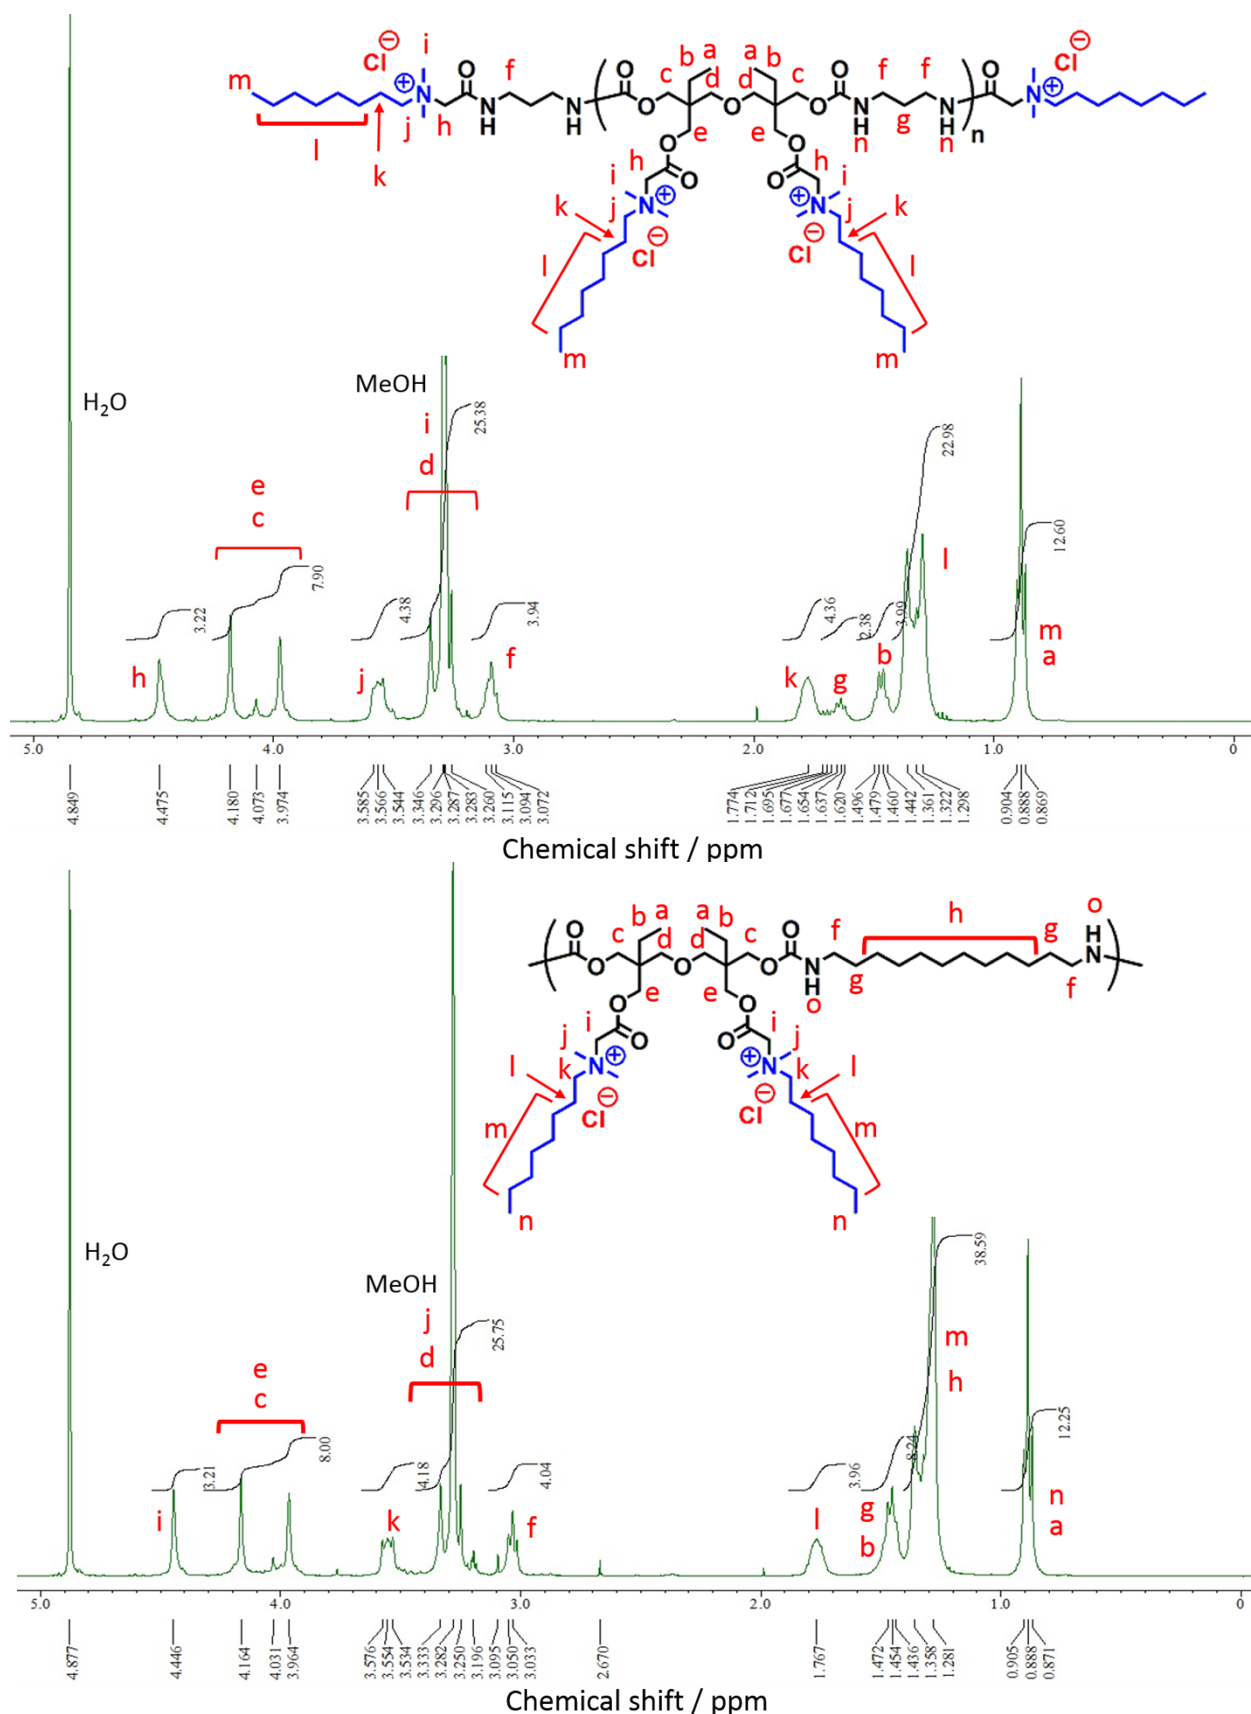

**Figure S9**  $^1\text{H}$  NMR spectra of QAC-functionalized PHUs ( $p(\text{DTMPC-C}_n\text{-DMOA-Cl})$ ) in  $\text{CD}_3\text{OD}$ . Top:  $p(\text{DTMPC-C}_3\text{-DMOA-Cl})$ . Bottom:  $p(\text{DTMPC-C}_{12}\text{-DMOA-Cl})$ . The PHUs were synthesized from DTMPC and corresponding diamines with different methylene spaces and acetylated. The attribution of each signal is depicted in the figures. For  $p(\text{DTMPC-C}_{12}\text{-DMOA-Cl})$ , the attribution of the both chain ends is omitted for clarity.



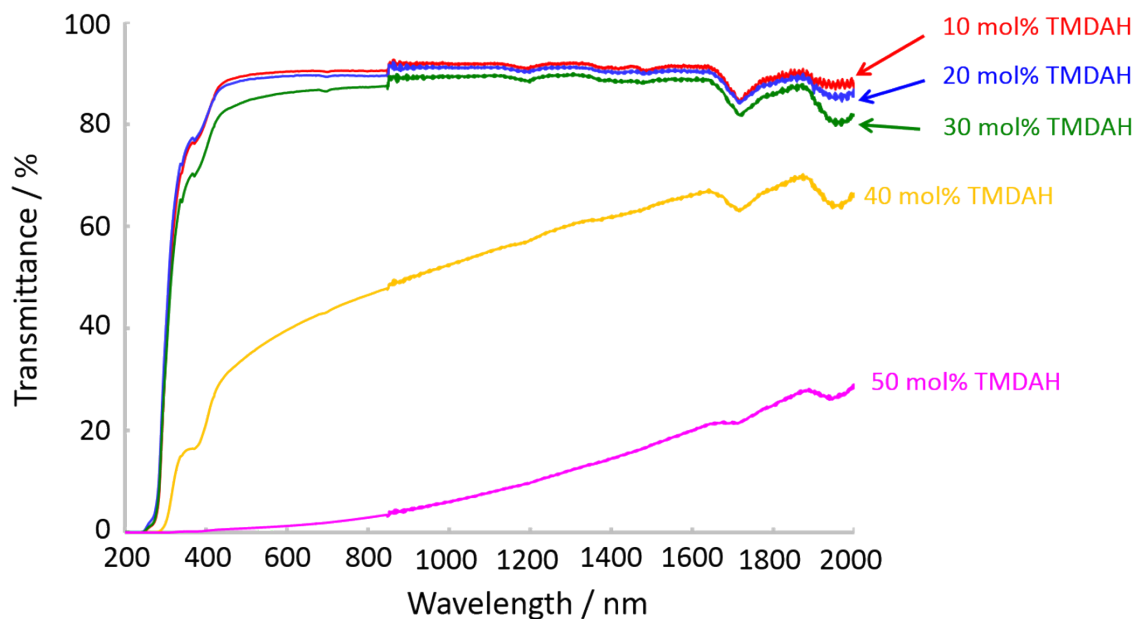

**Figure S10** Absorption spectra of QAC-functionalized PHU films (QAC-Films) prepared by the reaction of p(DTMPC-C<sub>6</sub>-Cl) with different amounts of TMDAH. TMDAH were 10 (red line), 20 (blue line), 30 (green line), 40 (orange line) or 50 mol% (purple line) with respect to chloroacetyl groups of PHU unit. At vertical axis, absorbance was converted to transmittance.

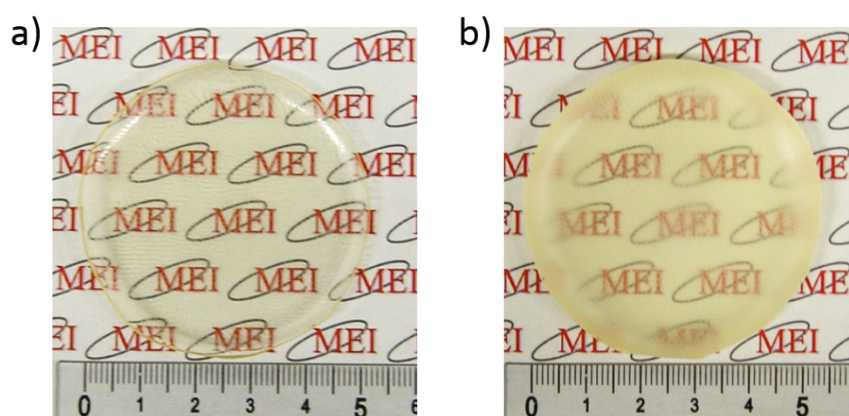

**Figure S11** Photographs of QAC-functionalized PHU films (QAC-Films) prepared by the reaction of p(DTMPC-C<sub>6</sub>-Cl) with different amounts of TMDAH. TMDAH were a) 40 or b) 50 mol% with respect to chloroacetyl groups of PHU unit.

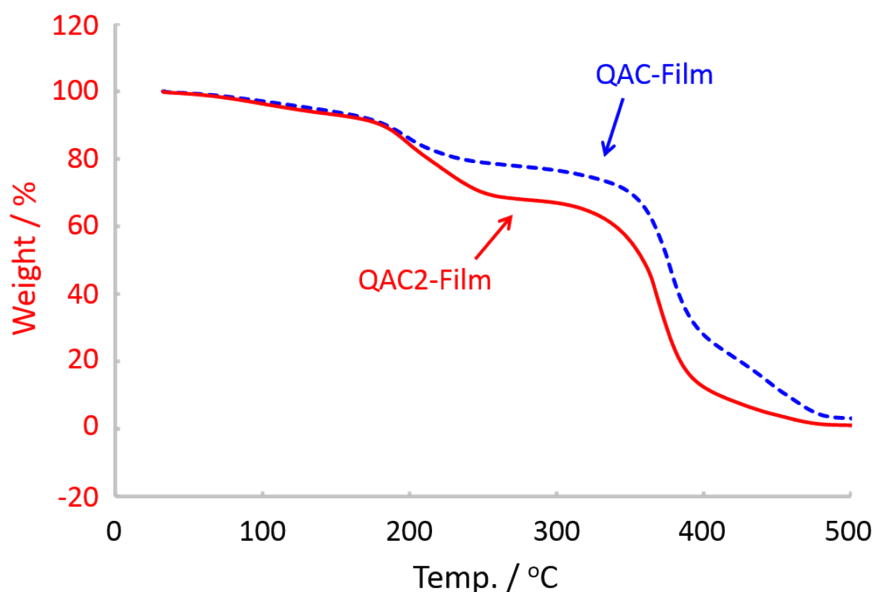

**Figure S12** TGA profiles of QAC-Film (blue broken line) or QAC2-Film (red solid line). The QAC-Film was prepared from p(DTMPC-C<sub>6</sub>-Cl) with 20 mol% of TMDAH and subsequently modified with DMOA to yield QAC2-Film.

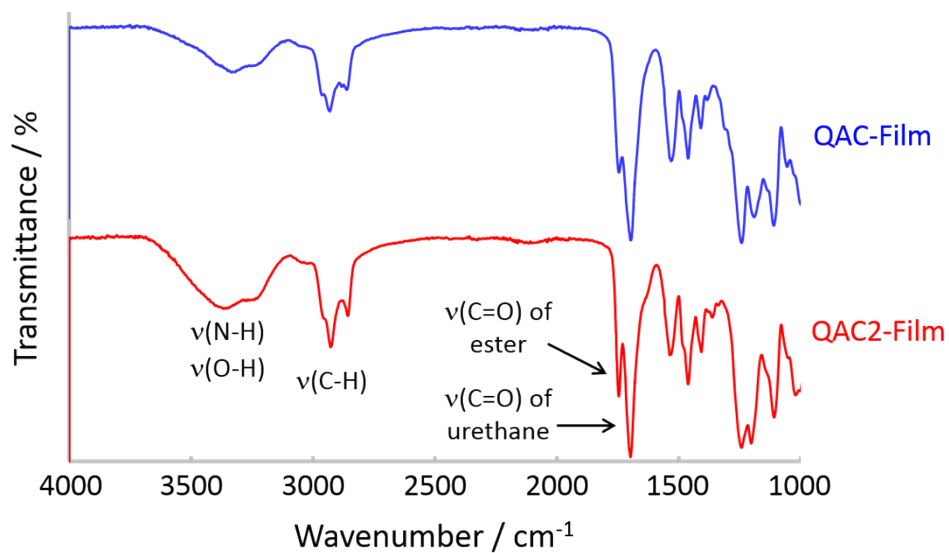

**Figure S13** FT-IR spectra of QAC-Film (top) or QAC2-Film (bottom). The QAC-Film was prepared from p(DTMPC-C<sub>6</sub>-Cl) with 20 mol% of TMDAH and subsequently modified with DMOA to yield QAC2-Film.
